# Supplementary material for: Multi-cancer analysis reveals universal association of oncogenic LBH expression with DNA hypomethylation and WNT-Integrin signaling pathways
Source: PubMed Central journal article supplement (PMC10501907; doi:10.1038/s41417-023-00633-y), 2023-06-02
Supplement: 41417_2023_633_MOESM1_ESM.pdf [file 41417_2023_633_MOESM1_ESM.pdf]

SUPPLEMENTARY INFORMATION

SUPPLEMENTARY FIGURES

Supplementary Figure S1

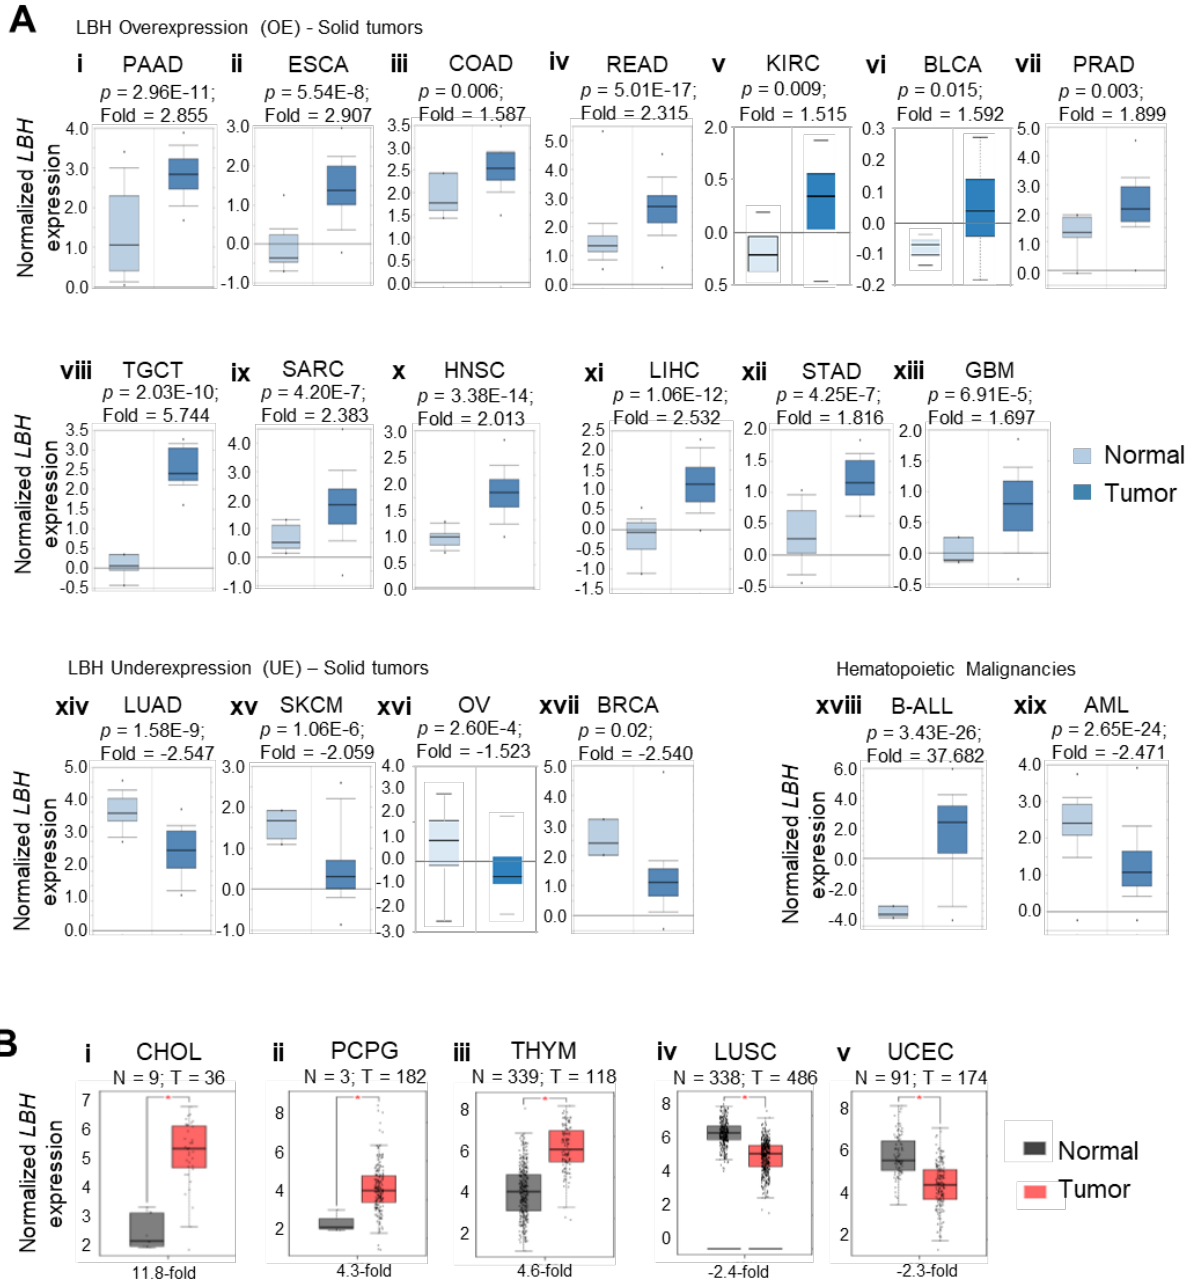

**Supplementary Figure S1: *LBH* expression levels in different cancer types.** **A.** Box plots showing differential *LBH* mRNA expression in tumor (dark blue) versus normal tissues (light blue). Cancer type-specific data was retrieved from Oncomine. Fold changes with *p*-values as indicated. **(i-xiii)** Solid tumors with *LBH* overexpression: PAAD; pancreatic adenocarcinoma, ESCA; Esophageal carcinoma, COAD; Colon adenocarcinoma, READ; Rectum adenocarcinoma, KIRC; Kidney renal clear cell carcinoma, BLCA; Bladder Urothelial Carcinoma, PRAD; Prostate adenocarcinoma, TGCT; Testicular Germ Cell Tumors, SARC; Sarcoma, HNSC; Head & Neck squamous cell carcinoma, LIHC; Liver hepatocellular carcinoma, STAD; Stomach adenocarcinoma, GBM; Glioblastoma multiforme. **(xiv-xvii)** Solid tumors with *LBH* underexpression: LUAD; Lung adenocarcinoma, SKCM; Skin Cutaneous Melanoma, OV; Ovarian serous cystadenocarcinoma, BRCA; Breast invasive carcinoma. **(xviii-xix)** Hematopoietic malignancies with *LBH* deregulation: B-ALL; B-cell acute lymphoblastic leukemia, AML; Acute Myeloid Leukemia. **B.** Box plots showing additional solid cancer types in TCGA with differential *LBH* expression in tumor (red) versus normal (grey) tissues. (i) CHOL; colon cholangial carcinoma, (ii) PCPG; pheochromocytoma and paraganglioma, (iii) THYM; thymoma, (iv) LUSC; lung squamous cell carcinoma, and (v) UCEC; uterine corpus endometrial carcinoma. The threshold was set at *p*-value = 0.05. The number of normal (N) and tumor (T) tissues is indicated for each cancer type. Data was extracted from the TCGA and GTEx databases using GEPIA2.

# Supplementary Figure S2

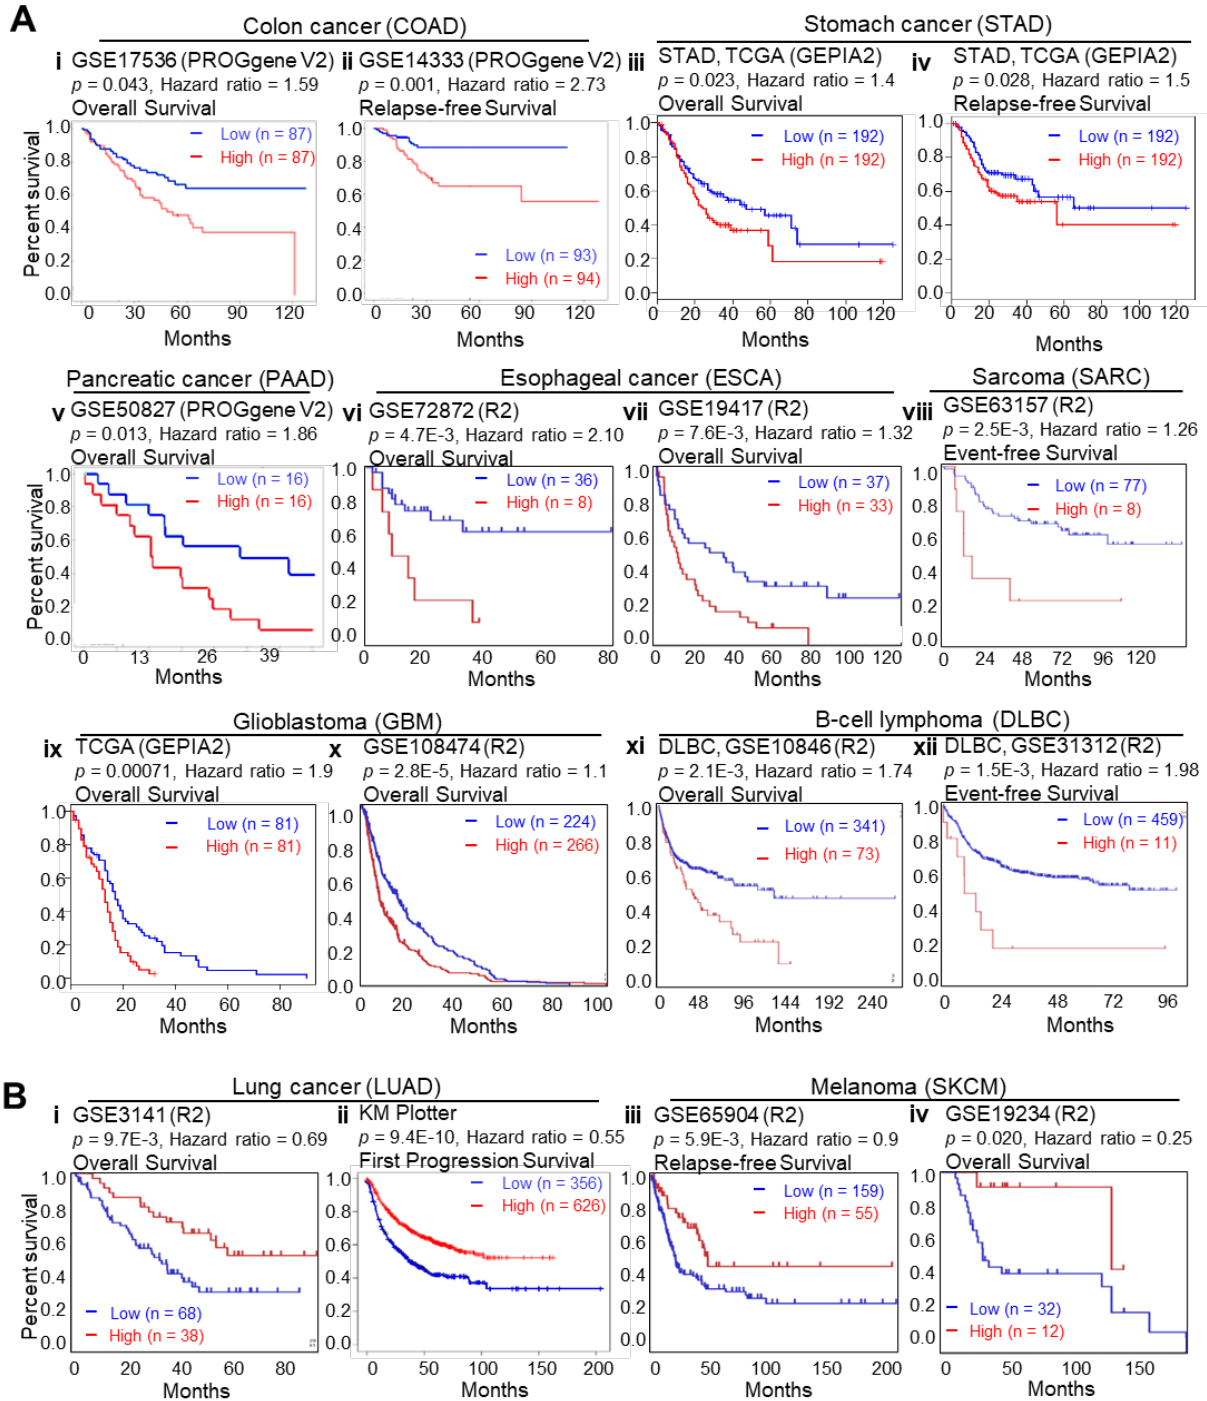

**Supplementary Figure S2: Correlation of *LBH* expression with patient survival.** Kaplan–Meier analysis comparing patients with high (red) and low (blue or black) *LBH* expression. **A.** High *LBH* expression correlated with poor prognosis in *LBH* overexpressing cancer types, including colon (i, ii), stomach (iii, iv), pancreatic (v), esophageal (vi, vii), sarcoma (viii), glioblastoma (ix, x), and diffuse large B-cell lymphoma (xi, xii). **B.** High *LBH* expression correlated with good prognosis in cancer types with *LBH* underexpression, i.e., lung cancer (i, ii), and melanoma (iii, iv). Log-rank test; *p*-value threshold < 0.05. COAD; colon adenocarcinoma, STAD; stomach adenocarcinoma, PAAD; pancreatic adenocarcinoma, ESCA; esophageal carcinoma, SARC; sarcoma, GBM; glioblastoma multiforme, DLBC; Diffuse Large B-cell lymphoma, LUAD; lung adenocarcinoma, SKCM; skin cutaneous melanoma.

# Supplementary Figure S3

## A LBH gene mutations

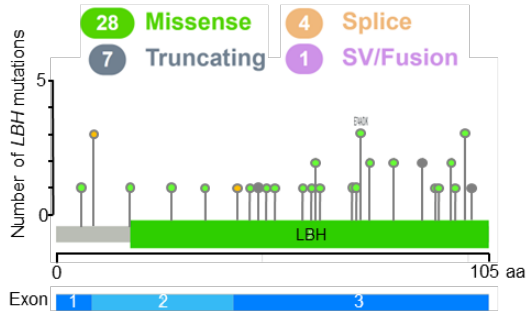

## B Top 20 cancer types with LBH mutations (n>100)

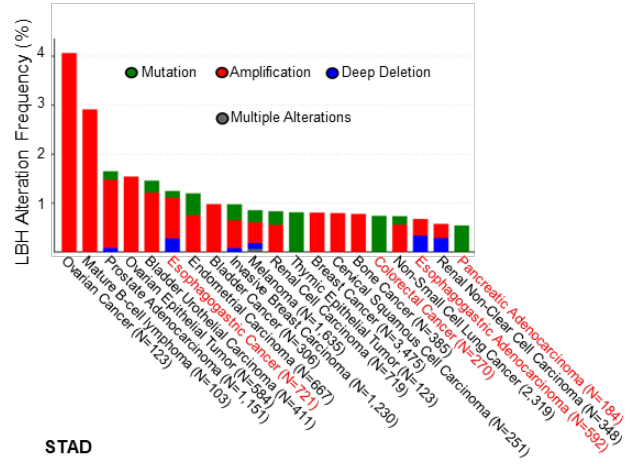

## C

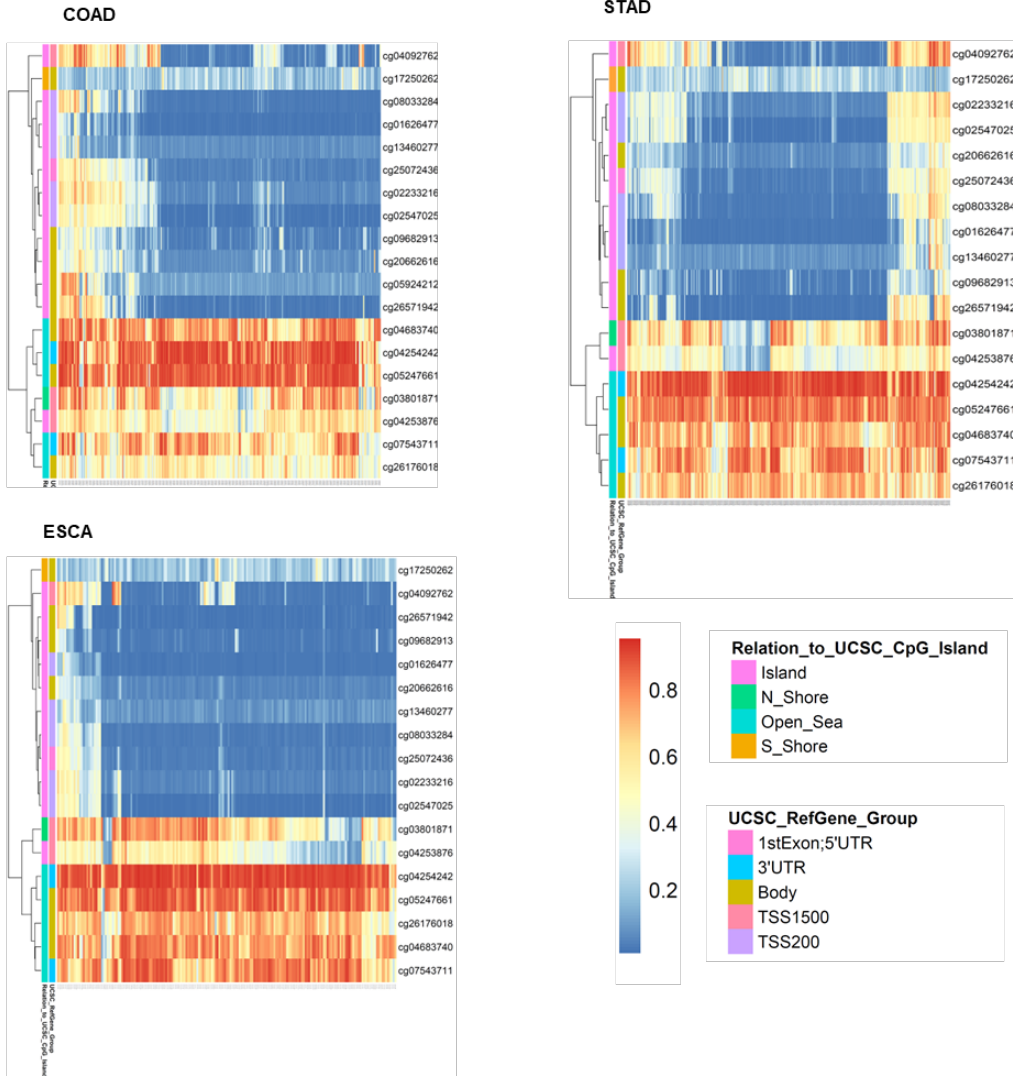

**Supplementary Figure S3: Gene alteration and DNA methylation analyses for *LBH* using cBioportal.** **A.** Forty alterations in the *LBH* gene locus were found comparing 90,279 cancer samples from 202 studies. **B.** The top 20 cancer types with *LBH* mutations. Datasets that have a sample size lower than 100 were excluded. **C.** The heatmaps of DNA methylation status at CpG sites in and around the *LBH* gene locus in COAD (n=275), ESCA (n=182), and STAD (n=408) patients. Blue signifies low, and orange equals high DNA methylation. Heatmaps were generated using the MethSurv database and patient data sets from TCGA. COAD; colon adenocarcinoma, ESCA; esophageal carcinoma, STAD; stomach adenocarcinoma.

# Supplementary Figure S4

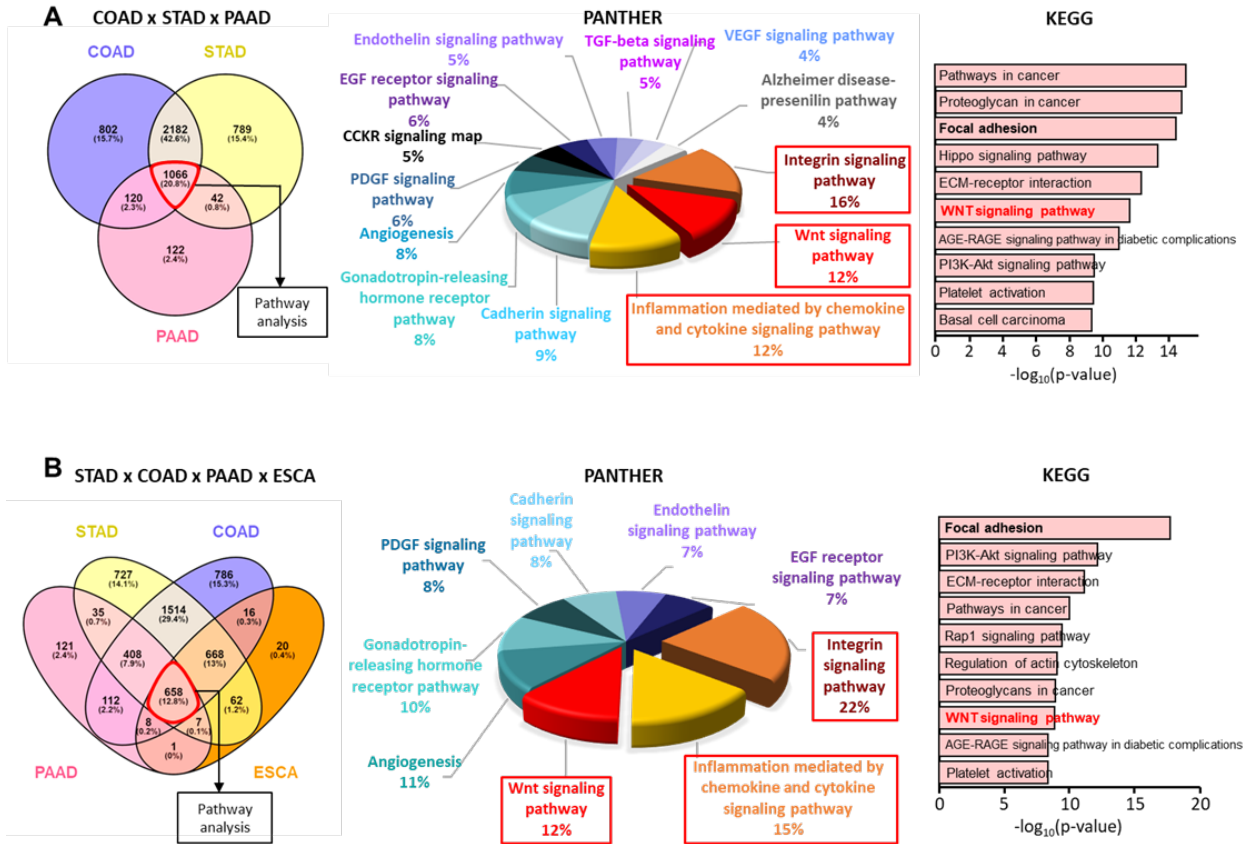

**Supplementary Figure S4: The pathway analyses with different cancer combinations. A. and B.** Venn diagram of genes that positively correlated with LBH in multiple cancer types as indicated (left). The identified common genes from all cancer type combinations were used for PANTHER (middle) of KEGG (right) pathway analysis. Pathways that have at least 10 predicted genes are listed. Note that the top 3 pathways are the integrin, WNT and inflammation signaling throughout different cancer-type combinations. **A.** Analysis of *LBH* positively correlated genes in three cancer types: COAD, STAD, and PAAD, or **B.** four cancer combinations: PAAD, STAD, COAD, and ESCA. COAD; colon adenocarcinoma, STAD; stomach adenocarcinoma, PAAD; pancreatic adenocarcinoma, ESCA; esophageal carcinoma.



Supplementary Figure S5

**A**

LUAD

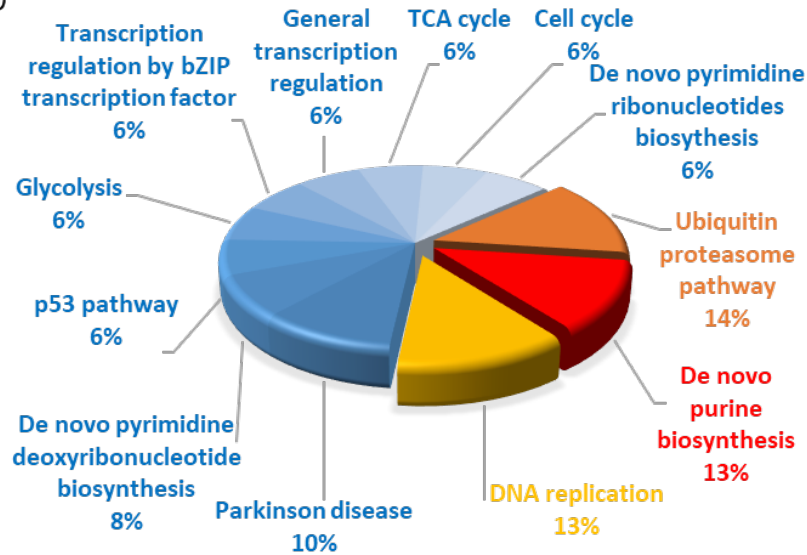

**B**

SKCM

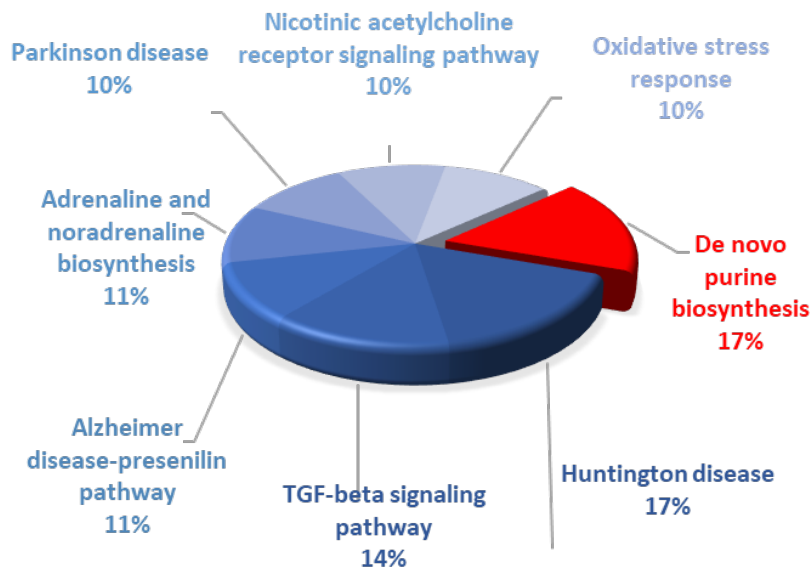

**Supplementary Figure S5: LBH correlated genes in LUAD and SKCM.** **A.** Pathway analysis using PANTHER in LUAD. **B.** Pathway analysis using PANTHER in SKCM. (A, B) Pathways that have at least 10 numbers of predicted gene hits are listed. LUAD; lung adenocarcinoma, SKCM; skin cutaneous melanoma.

Supplementary Figure S6

**A**

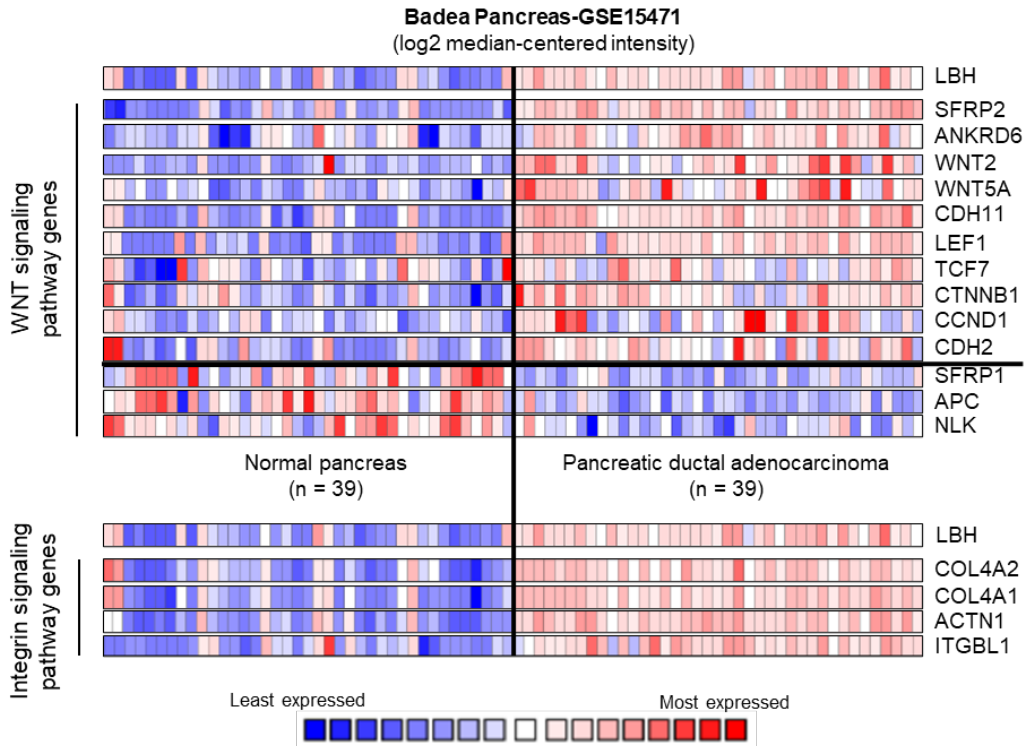

**B** From TCGA

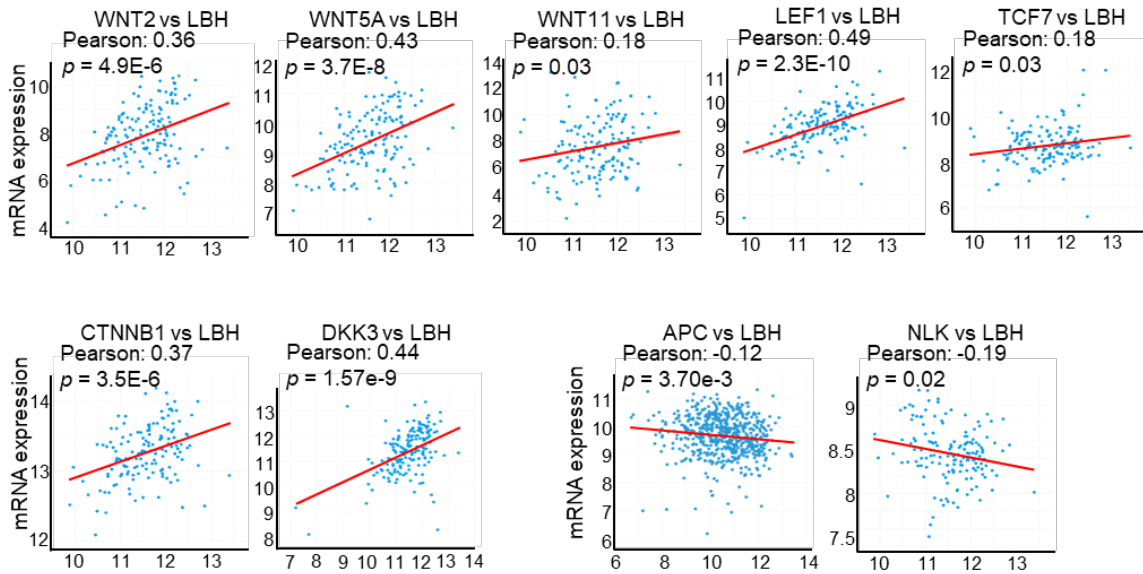

**Supplementary Figure S6: *LBH* correlated genes in pancreas cancer.** **A.** Heatmaps of *LBH* and correlated genes in the Wnt and integrin pathways in a representative pancreas cancer dataset (Badea\_Pancreas-GSE15471) from Oncomine. Blue signifies low, and red equals high mRNA expression. **B.** Plots represent correlation between *LBH* and Wnt pathway genes in pancreas cancer. The cBioportal database plotted data derived from TCGA. Pearson correlation coefficients and P-values as indicated.

Supplementary Figure S7

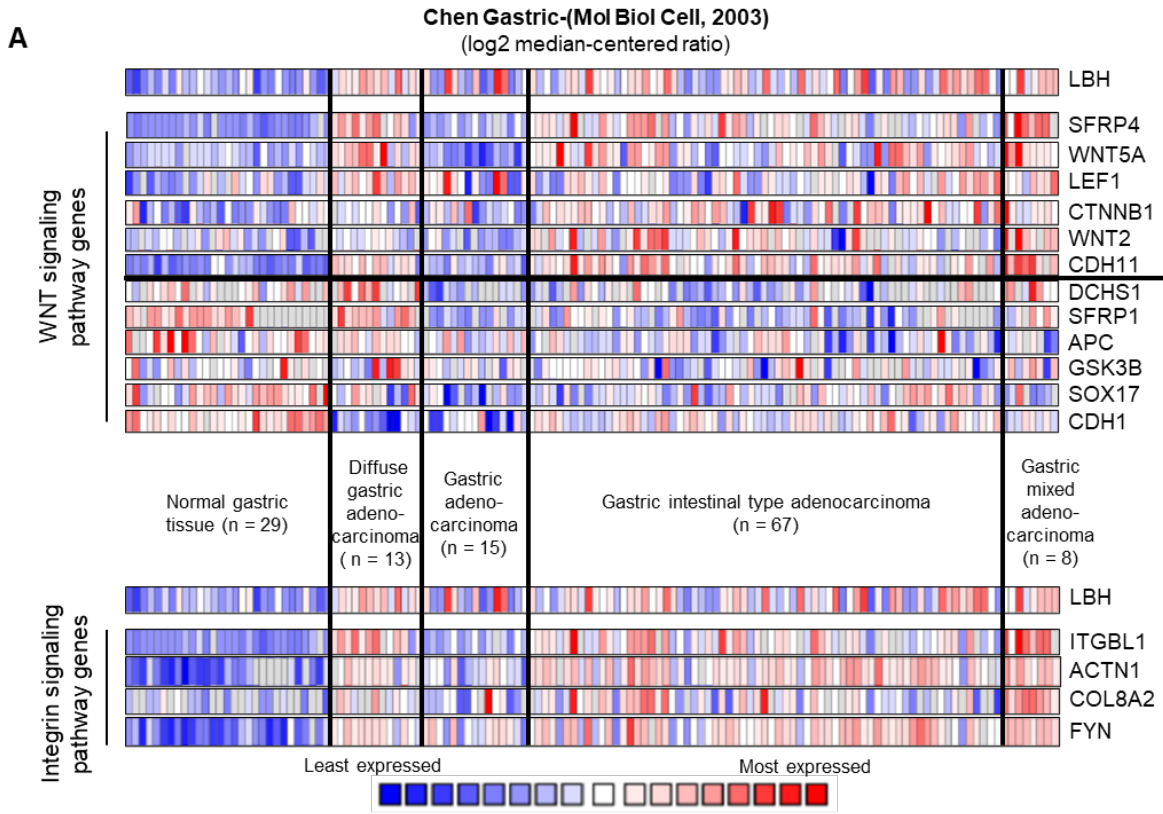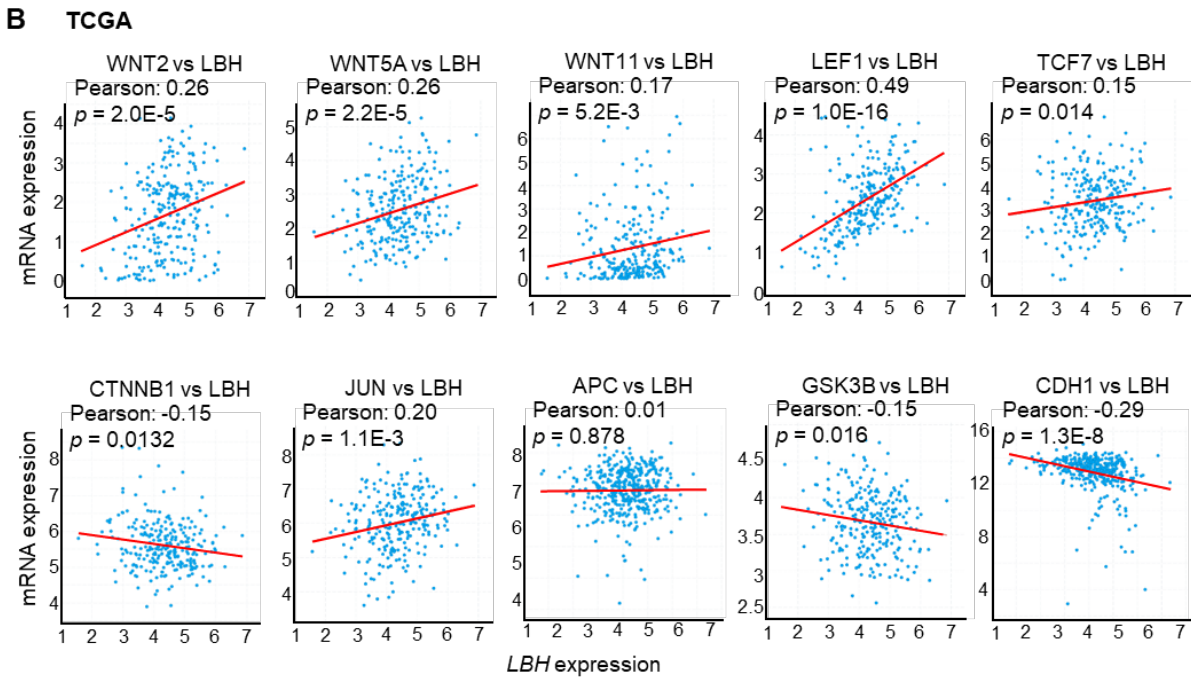

**Supplementary Figure S7: *LBH* correlated genes in gastric cancer.** **A.** Heatmaps of *LBH* and correlated genes in the Wnt and integrin pathways in a representative gastric cancer dataset (Chen\_Gastric Cancer) from Oncomine. Blue signifies low, and red equals high mRNA expression. **B.** Plots represent correlation between *LBH* and Wnt pathway genes in gastric cancer. The cBioportal database plotted data derived from TCGA. Pearson correlation coefficients and P-values as indicated.

Supplementary Figure S8

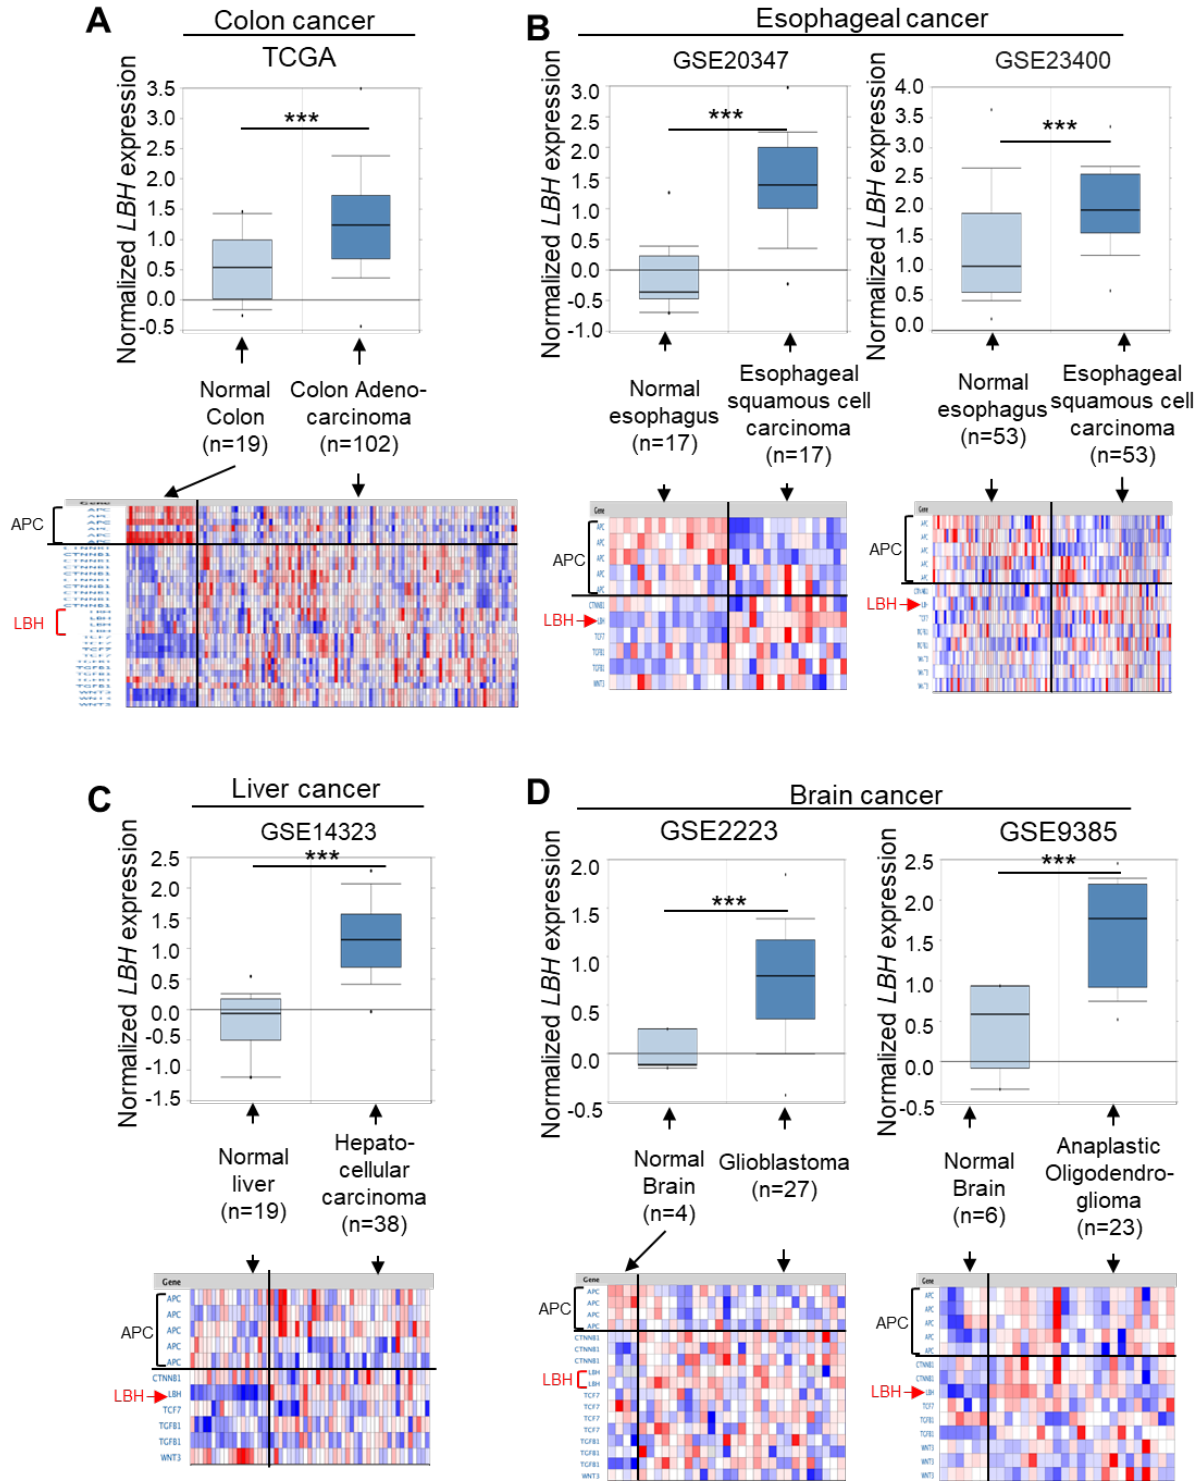

**Supplementary Figure S8: Co-expression of *LBH* and WNT pathway genes in different cancer types.** **A-D**, Box plots data showing the fold changes of *LBH* mRNA in tumor (dark blue) versus normal tissues (light blue). Heatmaps of *LBH* and correlated Wnt signaling gene expression (most expressed: red; least expressed: blue) for each patient in the indicted cancer datasets. Patients with *LBH* overexpression showed a high co-expression of oncogenic genes (e.g., *CTNNB1*, *TCF7*, *WNT3*), and low co-expression of tumor suppressor genes (e.g., *APC*) in the WNT signaling pathway. Representative human datasets in **(A)** Colon cancer, **(B)** Esophageal cancer, **(C)** Liver cancer, and **(D)** Brain cancer.

## SUPPLEMENTARY TABLES

### Supplementary Tables S1

Solid tumor cancer types with over-expressed *LBH* compared to normal tissue from the Oncomine database

| Cancer     | Cancer subtype                                | <i>p</i> -value | Fold change | Rank (%) | Sample | Reference |
|------------|-----------------------------------------------|-----------------|-------------|----------|--------|-----------|
| Brain      | Glioblastoma                                  | 6.91E-05        | 1.697       | 8        | 54     | [1]       |
|            | Anaplastic Oligoastrocytoma                   | 0.001           | 2.188       | 5        | 33     | [2]       |
| Colorectal | Rectal Adenocarcinoma                         | 5.01E-17        | 2.315       | 8        | 130    | [3]       |
|            | Colon Carcinoma Epithelia                     | 6.00E-06        | 2.065       | 9        | 40     | [4]       |
| Esophagus  | Esophageal Adenocarcinoma                     | 6.19E-10        | 3.919       | 1        | 48     | [5]       |
|            | Esophageal Squamous Cell Carcinoma            | 5.54E-08        | 2.907       | 2        | 34     | [6]       |
| Gastric    | Gastric Intestinal Type Adenocarcinoma        | 1.21E-08        | 1.577       | 8        | 132    | [7]       |
|            | Diffuse Gastric Adenocarcinoma                | 4.25E-07        | 1.816       | 1        | 132    | [7]       |
|            | Gastric Mixed Adenocarcinoma                  | 4.71E-04        | 1.9         | 6        | 132    | [7]       |
| Head-Neck  | Head and Neck Squamous Cell Carcinoma         | 3.38E-14        | 2.013       | 1        | 54     | [8]       |
|            | Oral Cavity Squamous Cell Carcinoma           | 2.64E-12        | 1.957       | 3        | 79     | [9]       |
|            | Oral Cavity Squamous Cell Carcinoma Epithelia | 9.55E-05        | 1.92        | 2        | 20     | [10]      |
|            | Oropharyngeal Carcinoma                       | 0.002           | 1.926       | 10       | 84     | [11]      |
| Liver      | Hepatocellular Carcinoma                      | 1.06E-12        | 2.532       | 1        | 115    | [14]      |
|            | Cirrhosis                                     | 2.54E-12        | 2.505       | 5        | 115    | [14]      |
| Pancreas   | Pancreatic Ductal Adenocarcinoma              | 2.96E-11        | 2.855       | 3        | 78     | [15]      |
|            | Pancreatic Carcinoma                          | 4.66E-04        | 3.03        | 5        | 17     | [16]      |
|            | Pancreatic Adenocarcinoma                     | 0.001           | 2.503       | 5        | 36     | [17]      |
| Prostate   | Prostate Carcinoma                            | 0.009           | 2.001       | 4        | 30     | [18]      |
| Sarcoma    | Myxoid/Round Cell Liposarcoma                 | 5.91E-08        | 2.864       | 7        | 158    | [19]      |
|            | Myxofibrosarcoma                              | 1.42E-07        | 2.628       | 8        | 158    | [19]      |
|            | Dedifferentiated Liposarcoma                  | 4.20E-07        | 2.383       | 7        | 158    | [19]      |
|            | Leiomyosarcoma                                | 1.04E-06        | 2.623       | 9        | 158    | [19]      |
| Testis     | Testicular Seminoma                           | 1.34E-04        | 5.602       | 1        | 30     | [20]      |
|            | Testicular Yolk Sac Tumor                     | 0.002           | 1.999       | 2        | 30     | [20]      |
| Seminoma   | Mixed Germ Cell Tumor, NOS                    | 1.49E-10        | 3.47        | 4        | 107    | [21]      |
|            | Seminoma, NOS                                 | 2.03E-10        | 5.744       | 1        | 107    | [21]      |
|            | Teratoma, NOS                                 | 2.56E-09        | 4.198       | 2        | 107    | [21]      |
|            | Testicular Seminoma                           | 2.81E-09        | 2.505       | 2        | 74     | [22]      |
|            | Embryonal Carcinoma, NOS                      | 7.03E-09        | 4.731       | 3        | 107    | [21]      |
|            | Yolk Sac Tumor, NOS                           | 9.57E-05        | 2.871       | 9        | 107    | [21]      |



## Supplementary Tables S2

Solid tumor cancer types with under-expressed *LBH* compared to normal tissue from the Oncomine database

| Cancer     | Cancer subtype                             | <i>p</i> -value | Fold change | Rank (%) | Sample | Reference |
|------------|--------------------------------------------|-----------------|-------------|----------|--------|-----------|
| Breast     | Invasive Breast Carcinoma                  | 9.31E-05        | -2.492      | 4        | 158    | [24]      |
|            | Ductal Breast Carcinoma                    | 2.08E-04        | -2.465      | 10       | 47     | [25]      |
|            | Ductal Breast Carcinoma in Situ Epithelia  | 6.53E-04        | -2.285      | 5        | 66     | [26]      |
|            | Invasive Ductal Breast Carcinoma Epithelia | 0.001           | -1.983      | 5        | 66     | [26]      |
|            | Mucinous Breast Carcinoma                  | 0.004           | -2.237      | 9        | 593    | TCGA      |
| Colorectal | Colon Adenoma Epithelia                    | 2.98E-04        | -2.004      | 9        | 40     | [4]       |
| Lung       | Lung Adenocarcinoma                        | 6.39E-17        | -2.191      | 5        | 116    | [29]      |
|            | Lung Adenocarcinoma                        | 7.59E-11        | -1.714      | 8        | 107    | [30]      |
|            | Large Cell Lung Carcinoma                  | 5.68E-10        | -4.381      | 5        | 156    | [31]      |
|            | Lung Adenocarcinoma                        | 1.58E-09        | -2.547      | 3        | 66     | [32]      |
| Melanoma   | Cutaneous Melanoma                         | 1.06E-06        | -2.059      | 5        | 70     | [35]      |

## Supplementary Tables S3

Hematopoietic malignancies with differential *LBH* over- or under-expression compared to normal tissue from the Oncomine database.

| Cancer                                 | <i>LBH</i> expression | Cancer subtype                                   | <i>p</i> -value | Fold change | Rank (%) | Sample | Reference |
|----------------------------------------|-----------------------|--------------------------------------------------|-----------------|-------------|----------|--------|-----------|
| Leukemia                               | Up                    | B-Cell Acute Lymphoblastic Leukemia              | 3.43E-26        | 37.682      | 1        | 127    | [12]      |
|                                        |                       | Chronic Lymphocytic Leukemia                     | 3.73E-05        | 2.789       | 5        | 102    | [13]      |
|                                        | Down                  | Acute Myeloid Leukemia                           | 7.47E-26        | -2.229      | 2        | 2,096  | [27]      |
|                                        |                       | Chronic Myelogenous Leukemia                     | 2.65E-24        | -2.471      | 1        | 2,096  | [27]      |
|                                        |                       | Chronic Adult T-Cell Leukemia/Lymphoma           | 0.008           | -2.274      | 10       | 47     | [28]      |
| Lymphoma                               | Up                    | Follicular Lymphoma                              | 1.87E-04        | 3.446       | 2        | 102    | [13]      |
|                                        | Down                  | Anaplastic Large Cell Lymphoma, ALK-Negative     | 7.56E-13        | -3.851      | 1        | 64     | [33]      |
|                                        |                       | Anaplastic Large Cell Lymphoma                   | 2.81E-05        | -2.348      | 10       | 60     | [34]      |
|                                        |                       | Anaplastic Large Cell Lymphoma, ALK-Positive     | 3.52E-05        | -3.874      | 3        | 64     | [33]      |
|                                        |                       | Primary Cutaneous Anaplastic Large Cell Lymphoma | 1.63E-04        | -5.143      | 5        | 64     | [33]      |
|                                        |                       | Classical Hodgkin's Lymphoma                     | 8.53E-04        | -3.085      | 5        | 64     | [33]      |
| Chronic Adult T-Cell Leukemia/Lymphoma | 0.008                 | -2.274                                           | 10              | 47          | [28]     |        |           |

## Supplementary Table S4

The significant prognostic values of *LBH* CpG methylation in cancers

| Cancer type | CpG Name   | Hazard ratio | CI           | Log Rank test P value | UCSC Ref Gene Group | Relation to UCSC CpG Island |
|-------------|------------|--------------|--------------|-----------------------|---------------------|-----------------------------|
| STAD        | cg20662616 | 0.548        | 0.395; 0.76  | 2.70E-04              | Body                | Island                      |
|             | cg04092762 | 0.519        | 0.332; 0.81  | 1.90E-03              | TSS1500             | Island                      |
|             | cg08033284 | 0.603        | 0.436; 0.834 | 2.70E-03              | TSS200              | Island                      |
|             | cg03801871 | 0.567        | 0.368; 0.872 | 6.00E-03              | TSS1500             | N_Shore                     |
|             | cg02233216 | 0.629        | 0.443; 0.894 | 7.90E-03              | TSS200              | Island                      |
|             | cg04253876 | 0.578        | 0.373; 0.897 | 9.50E-03              | TSS1501             | Island                      |
|             | cg17250262 | 1.541        | 1.086; 2.187 | 0.013                 | Body                | S_Shore                     |
|             | cg13460277 | 0.632        | 0.432; 0.924 | 0.014                 | TSS200              | Island                      |
|             | cg04254242 | 1.529        | 1.079; 2.167 | 0.015                 | 3'UTR               | Open_Sea                    |
|             | cg25072436 | 0.675        | 0.487; 0.935 | 0.017                 | 1st Exon; 5'UTR     | Island                      |
|             | cg04683740 | 0.631        | 0.421; 0.947 | 0.020                 | Body                | Open_Sea                    |
|             | cg05247661 | 0.66         | 0.459; 0.949 | 0.021                 | Body                | Open_Sea                    |
|             | cg02547025 | 0.687        | 0.487; 0.97  | 0.030                 | TSS200              | Island                      |
|             | cg09682913 | 0.7          | 0.506; 0.968 | 0.030                 | Body                | Island                      |
|             | cg26176018 | 1.526        | 1.022; 2.278 | 0.032                 | Body                | Open_Sea                    |
|             | cg26571942 | 0.668        | 0.449; 0.994 | 0.039                 | Body                | Island                      |
|             | cg07543711 | 1.472        | 1.031; 2.102 | 0.039                 | 3'UTR               | Open_Sea                    |
|             | cg01626477 | 0.689        | 0.473; 1.004 | 0.046                 | TSS200              | Island                      |
| COAD        | cg04254242 | 1.819        | 1.038; 3.189 | 0.028                 | 3'UTR               | Open_Sea                    |
|             | cg26571942 | 0.61         | 0.379; 0.983 | 0.041                 | Body                | Island                      |
| PAAD        | cg04253876 | 2.172        | 1.361; 3.465 | 5.80E-04              | TSS1501             | Island                      |
|             | cg25072436 | 0.635        | 0.422; 0.957 | 0.034                 | 1st Exon; 5'UTR     | Island                      |
|             | cg17250262 | 0.611        | 0.374; 1     | 0.04                  | Body                | S_Shore                     |
| ESCA        | cg04683740 | 0.533        | 0.337; 0.842 | 0.009                 | Body                | Open_Sea                    |
|             | cg04254242 | 0.56         | 0.353; 0.888 | 0.012                 | 3'UTR               | Open_Sea                    |
|             | cg02233216 | 0.603        | 0.363; 1.002 | 4.40E-02              | TSS200              | Island                      |
|             | cg13460277 | 0.602        | 0.36; 1.006  | 0.044                 | TSS200              | Island                      |
|             | cg07543711 | 0.61         | 0.379; 0.981 | 0.047                 | 3'UTR               | Open_Sea                    |

## Supplementary Table S5

PANTHER pathway analysis of positively *LBH* co-expressed genes in different cancer types  
Gastrointestinal Tract Cancers

### COAD

| Rank | Category name                                                                     | genes hit # | genes hit %  |
|------|-----------------------------------------------------------------------------------|-------------|--------------|
| 1    | <b>WNT signaling pathway</b>                                                      | <b>111</b>  | <b>11.65</b> |
| 2    | Inflammation mediated by chemokine and cytokine signaling pathway                 | 108         | 11.44        |
| 3    | Gonadotropin-releasing hormone receptor pathway                                   | 86          | 9.11         |
| 4    | Integrin signaling pathway                                                        | 87          | 9.11         |
| 5    | Cadherin signaling pathway                                                        | 75          | 7.84         |
| 6    | Angiogenesis                                                                      | 66          | 6.99         |
| 7    | CCKR signaling map                                                                | 57          | 5.93         |
| 8    | Heterotrimeric G-protein signaling pathway-Gi alpha and Gs alpha mediated pathway | 56          | 5.93         |
| 9    | PDGF signaling pathway                                                            | 52          | 5.51         |
| 10   | Alzheimer disease-presenilin pathway                                              | 50          | 5.3          |
| 11   | Heterotrimeric G-protein signaling pathway-Gq alpha and Go alpha mediated pathway | 49          | 5.08         |
| 12   | EGF receptor signaling pathway                                                    | 46          | 4.87         |
| 13   | T cell activation                                                                 | 39          | 4.03         |
| 14   | Apoptosis signaling pathway                                                       | 35          | 3.6          |
| 15   | TGF-beta signaling pathway                                                        | 35          | 3.6          |

### STAD

| Rank | Category name                                                                     | genes hit # | genes hit %  |
|------|-----------------------------------------------------------------------------------|-------------|--------------|
| 1    | <b>WNT signaling pathway</b>                                                      | <b>109</b>  | <b>12.11</b> |
| 2    | Inflammation mediated by chemokine and cytokine signaling pathway                 | 91          | 10.13        |
| 3    | Gonadotropin-releasing hormone receptor pathway                                   | 85          | 9.47         |
| 4    | Integrin signaling pathway                                                        | 81          | 9.03         |
| 5    | Cadherin signaling pathway                                                        | 75          | 8.37         |
| 6    | Angiogenesis                                                                      | 63          | 7.05         |
| 7    | CCKR signaling map                                                                | 55          | 6.17         |
| 8    | Heterotrimeric G-protein signaling pathway-Gi alpha and Gs alpha mediated pathway | 55          | 6.17         |
| 9    | PDGF signaling pathway                                                            | 48          | 5.29         |
| 10   | Heterotrimeric G-protein signaling pathway-Gq alpha and Go alpha mediated pathway | 45          | 5.07         |
| 11   | EGF receptor signaling pathway                                                    | 43          | 4.85         |
| 12   | Alzheimer disease-presenilin pathway                                              | 40          | 4.41         |
| 13   | TGF-beta signaling pathway                                                        | 38          | 4.19         |
| 14   | Endothelin signaling pathway                                                      | 35          | 3.96         |
| 15   | T cell activation                                                                 | 33          | 3.74         |

### LIHC

| Rank | Category name                                                                     | genes hit # | genes hit % |
|------|-----------------------------------------------------------------------------------|-------------|-------------|
| 1    | Inflammation mediated by chemokine and cytokine signaling pathway                 | 124         | 12.3        |
| 2    | <b>WNT signaling pathway</b>                                                      | <b>119</b>  | <b>11.9</b> |
| 3    | Integrin signaling pathway                                                        | 97          | 9.68        |
| 4    | Angiogenesis                                                                      | 84          | 8.27        |
| 5    | Cadherin signaling pathway                                                        | 73          | 7.26        |
| 6    | Gonadotropin-releasing hormone receptor pathway                                   | 69          | 6.85        |
| 7    | CCKR signaling map                                                                | 55          | 5.44        |
| 8    | EGF receptor signaling pathway                                                    | 55          | 5.44        |
| 9    | PDGF signaling pathway                                                            | 53          | 5.24        |
| 10   | Alzheimer disease-presenilin pathway                                              | 51          | 5.04        |
| 11   | T cell activation                                                                 | 49          | 4.84        |
| 12   | Heterotrimeric G-protein signaling pathway-Gq alpha and Go alpha mediated pathway | 47          | 4.64        |
| 13   | Apoptosis signaling pathway                                                       | 44          | 4.44        |
| 14   | Heterotrimeric G-protein signaling pathway-Gi alpha and Gs alpha mediated pathway | 44          | 4.44        |
| 15   | Huntington disease                                                                | 43          | 4.23        |

## Supplementary Table S5 - continued

### READ

| Rank | Category name                                                                     | genes hit # | genes hit % |
|------|-----------------------------------------------------------------------------------|-------------|-------------|
| 1    | Integrin signaling pathway                                                        | 56          | 13.23       |
| 2    | WNT signaling pathway                                                             | 46          | 11.02       |
| 3    | Inflammation mediated by chemokine and cytokine signaling pathway                 | 45          | 10.62       |
| 4    | Gonadotropin-releasing hormone receptor pathway                                   | 37          | 8.82        |
| 5    | Angiogenesis                                                                      | 36          | 8.62        |
| 6    | Cadherin signaling pathway                                                        | 28          | 6.61        |
| 7    | Alzheimer disease-presenilin pathway                                              | 24          | 5.61        |
| 8    | CCKR signaling map                                                                | 23          | 5.41        |
| 9    | PDGF signaling pathway                                                            | 21          | 5.01        |
| 10   | Heterotrimeric G-protein signaling pathway-Gq alpha and Go alpha mediated pathway | 20          | 4.81        |
| 11   | Heterotrimeric G-protein signaling pathway-Gi alpha and Gs alpha mediated pathway | 19          | 4.61        |
| 12   | EGF receptor signaling pathway                                                    | 18          | 4.21        |
| 13   | T cell activation                                                                 | 16          | 3.81        |
| 14   | FGF signaling pathway                                                             | 16          | 3.81        |
| 15   | Endothelin signaling pathway                                                      | 16          | 3.81        |

### PAAD

| Rank | Category name                                                     | genes hit # | genes hit % |
|------|-------------------------------------------------------------------|-------------|-------------|
| 1    | Integrin signaling pathway                                        | 56          | 14.36       |
| 2    | WNT signaling pathway                                             | 42          | 10.73       |
| 3    | Inflammation mediated by chemokine and cytokine signaling pathway | 40          | 10.18       |
| 4    | Gonadotropin-releasing hormone receptor pathway                   | 31          | 8           |
| 5    | Cadherin signaling pathway                                        | 31          | 8           |
| 6    | Angiogenesis                                                      | 30          | 7.64        |
| 7    | PDGF signaling pathway                                            | 24          | 6.18        |
| 8    | EGF receptor signaling pathway                                    | 24          | 6.18        |
| 9    | CCKR signaling map                                                | 19          | 4.91        |
| 10   | Endothelin signaling pathway                                      | 19          | 4.91        |
| 11   | Alzheimer disease-presenilin pathway                              | 17          | 4.36        |
| 12   | TGF-beta signaling pathway                                        | 17          | 4.36        |
| 13   | VEGF signaling pathway                                            | 15          | 3.82        |
| 14   | T cell activation                                                 | 13          | 3.27        |
| 15   | Apoptosis signaling pathway                                       | 12          | 3.09        |

### ESCA

| Rank | Category name                                                                     | genes hit # | genes hit % |
|------|-----------------------------------------------------------------------------------|-------------|-------------|
| 1    | Integrin signaling pathway                                                        | 48          | 13.16       |
| 2    | Inflammation mediated by chemokine and cytokine signaling pathway                 | 40          | 11.13       |
| 3    | WNT signaling pathway                                                             | 33          | 9.11        |
| 4    | Gonadotropin-releasing hormone receptor pathway                                   | 31          | 8.5         |
| 5    | Angiogenesis                                                                      | 26          | 7.09        |
| 6    | PDGF signaling pathway                                                            | 22          | 6.07        |
| 7    | Heterotrimeric G-protein signaling pathway-Gi alpha and Gs alpha mediated pathway | 22          | 6.07        |
| 8    | Cadherin signaling pathway                                                        | 21          | 5.87        |
| 9    | Endothelin signaling pathway                                                      | 20          | 5.47        |
| 10   | Heterotrimeric G-protein signaling pathway-Gq alpha and Go alpha mediated pathway | 19          | 5.26        |
| 11   | EGF receptor signaling pathway                                                    | 18          | 5.06        |
| 12   | CCKR signaling map                                                                | 17          | 4.66        |
| 13   | Alzheimer disease-presenilin pathway                                              | 16          | 4.45        |
| 14   | T cell activation                                                                 | 16          | 4.45        |
| 15   | FGF signaling pathway                                                             | 13          | 3.64        |

## Supplementary Table S5 - continued

### Urogenital Tract Cancers

#### KIRC

| Rank | Category name                                                                     | genes hit # | genes hit % |
|------|-----------------------------------------------------------------------------------|-------------|-------------|
| 1    | WNT signaling pathway                                                             | 79          | 10.61       |
| 2    | Integrin signaling pathway                                                        | 77          | 10.41       |
| 3    | Inflammation mediated by chemokine and cytokine signaling pathway                 | 77          | 10.41       |
| 4    | Gonadotropin-releasing hormone receptor pathway                                   | 65          | 8.78        |
| 5    | Angiogenesis                                                                      | 65          | 8.78        |
| 6    | CCKR signaling map                                                                | 45          | 6.12        |
| 7    | PDGF signaling pathway                                                            | 46          | 6.12        |
| 8    | Cadherin signaling pathway                                                        | 44          | 5.92        |
| 9    | Heterotrimeric G-protein signaling pathway-Gi alpha and Gs alpha mediated pathway | 41          | 5.51        |
| 10   | Alzheimer disease-presenilin pathway                                              | 38          | 5.1         |
| 11   | EGF receptor signaling pathway                                                    | 38          | 5.1         |
| 12   | Heterotrimeric G-protein signaling pathway-Gq alpha and Go alpha mediated pathway | 35          | 4.69        |
| 13   | TGF-beta signaling pathway                                                        | 31          | 4.29        |
| 14   | Apoptosis signaling pathway                                                       | 30          | 4.08        |
| 15   | Endothelin signaling pathway                                                      | 30          | 4.08        |

#### BLCA

| Rank | Category name                                                                     | genes hit # | genes hit % |
|------|-----------------------------------------------------------------------------------|-------------|-------------|
| 1    | Inflammation mediated by chemokine and cytokine signaling pathway                 | 100         | 14.07       |
| 2    | Integrin signaling pathway                                                        | 79          | 10.99       |
| 3    | WNT signaling pathway                                                             | 60          | 8.35        |
| 4    | Angiogenesis                                                                      | 56          | 7.91        |
| 5    | Gonadotropin-releasing hormone receptor pathway                                   | 55          | 7.69        |
| 6    | Heterotrimeric G-protein signaling pathway-Gi alpha and Gs alpha mediated pathway | 48          | 6.81        |
| 7    | Alzheimer disease-presenilin pathway                                              | 46          | 6.37        |
| 8    | CCKR signaling map                                                                | 41          | 5.71        |
| 9    | Heterotrimeric G-protein signaling pathway-Gq alpha and Go alpha mediated pathway | 39          | 5.49        |
| 10   | PDGF signaling pathway                                                            | 36          | 5.05        |
| 11   | T cell activation                                                                 | 34          | 4.84        |
| 12   | Cadherin signaling pathway                                                        | 35          | 4.84        |
| 13   | Endothelin signaling pathway                                                      | 31          | 4.4         |
| 14   | EGF receptor signaling pathway                                                    | 27          | 3.74        |
| 15   | Apoptosis signaling pathway                                                       | 26          | 3.74        |

#### PRAD

| Rank | Category name                                                     | genes hit # | genes hit % |
|------|-------------------------------------------------------------------|-------------|-------------|
| 1    | Integrin signaling pathway                                        | 24          | 21.05       |
| 2    | Angiogenesis                                                      | 18          | 15.79       |
| 3    | Gonadotropin-releasing hormone receptor pathway                   | 13          | 11.46       |
| 4    | WNT signaling pathway                                             | 13          | 11.46       |
| 5    | PDGF signaling pathway                                            | 12          | 10.53       |
| 6    | Inflammation mediated by chemokine and cytokine signaling pathway | 12          | 10.53       |
| 7    | EGF receptor signaling pathway                                    | 12          | 10.53       |
| 8    | T cell activation                                                 | 10          | 8.67        |

#### Brain Cancer

#### GBM

| Rank | Category name                        | genes hit # | genes hit % |
|------|--------------------------------------|-------------|-------------|
| 1    | Integrin signaling pathway           | 17          | 30.56       |
| 2    | WNT signaling pathway                | 14          | 22.22       |
| 3    | Alzheimer disease-presenilin pathway | 13          | 19.44       |
| 4    | CCKR signaling map                   | 12          | 16.67       |
| 5    | PDGF signaling pathway               | 10          | 11.11       |

### Supplementary Table S6

LBH plus correlated genes in WNT and integrin pathways increased predictive power for cancer survival in multivariate Cox regression analysis using TCGA datasets

#### COAD

| Gene/cluster                                     | <i>p</i> value | Hazard ratio | 95% CI       |
|--------------------------------------------------|----------------|--------------|--------------|
| LBH                                              | 0.015          | 1.8          | 1.00 - 2.58  |
| Correlated genes in WNT pathway                  | 1.73E-04       | 2.54         | 1.54 - 4.17  |
| Correlated genes in integrin pathway             | 1.42E-06       | 3.77         | 2.17 - 6.50  |
| LBH + correlated genes in WNT pathway            | 1.85E-04       | 2.56         | 1.56 - 4.19  |
| LBH + correlated genes in integrin pathway       | 1.51E-06       | 3.79         | 2.20 - 6.51  |
| LBH + correlated genes in WNT& Integrin pathways | 2.30E-09       | 7.72         | 5.10 - 12.21 |

#### PAAD

| Gene/cluster                                     | <i>p</i> value | Hazard ratio | 95% CI       |
|--------------------------------------------------|----------------|--------------|--------------|
| LBH                                              | 0.013          | 1.89         | 0.95 - 3.76  |
| Correlated genes in WNT pathway                  | 1.05E-05       | 2.69         | 1.72 - 4.19  |
| Correlated genes in integrin pathway             | 8.21E-07       | 3.15         | 1.99 - 5.00  |
| LBH + correlated genes in WNT pathway            | 1.07E-05       | 2.7          | 1.73 - 4.20  |
| LBH + correlated genes in integrin pathway       | 8.29E-07       | 3.18         | 2.01 - 5.03  |
| LBH + correlated genes in WNT& Integrin pathways | 6.61E-14       | 7.41         | 4.39 - 12.50 |

#### STAD

| Gene/cluster                                     | <i>p</i> value | Hazard ratio | 95% CI       |
|--------------------------------------------------|----------------|--------------|--------------|
| LBH                                              | 3.00E-03       | 1.68         | 1.18 - 2.4   |
| Correlated genes in WNT pathway                  | 3.44E-06       | 2.37         | 1.63 - 3.43  |
| Correlated genes in integrin pathway             | 1.78E-04       | 2.55         | 1.55 - 4.18  |
| LBH + correlated genes in WNT pathway            | 3.65E-06       | 2.39         | 1.65 - 3.45  |
| LBH + correlated genes in integrin pathway       | 1.85E-04       | 2.56         | 1.56 - 4.19  |
| LBH + correlated genes in WNT& Integrin pathways | 1.62E-08       | 5.95         | 3.20 - 11.05 |

Statistical analysis: log-rank test

## Supplementary Table S7: Primers

### Primers used for Methylation-specific qPCR

| Primer set                       | Forward                      | Reverse                    |
|----------------------------------|------------------------------|----------------------------|
| LBH-M1 (Methylation product 1)   | GTTTTTGTGTTTTGTTGTTATGAGC    | CTAATCTACAACCCTAAATTCCGTA  |
| LBH-U1 (Unmethylation product 1) | TTTTTGTGTTTTGTTGTTATGAGTGA   | TAATCTACAACCCTAAATTCCATA   |
| LBH-M2                           | TTTTTCGTAAGTTAACGCGTTTC      | TAAACCTCTCTCTAAAAATCCTCGC  |
| LBH-U2                           | AGTTTTTGTGTAAGTTAATGTGTTTTGT | TAAACCTCTCTCTAAAAATCCTCACC |
| LBH-M3                           | GAGGTTTAGTATGGGGAATAAACGT    | GCTCGAAACATAACAACCTCGAC    |
| LBH-U3                           | GAGGTTTAGTATGGGGAATAAATGT    | AAACCACTCAAAACATAACAACCTCA |

### Primers used for qPCR

| Primer set | Forward            | Reverse              |
|------------|--------------------|----------------------|
| LBH        | TCACTGCCCGACTATCTG | GGTCCACCACTATGGAGG   |
| GAPDH      | GGTCCACCACTATGGAGG | GACAAGCTTCCCGTTCTCAG |

## SUPPLEMENTARY REFERENCES

- 1 Bredel, M., Functional Network Analysis Reveals Extended Gliomagenesis Pathway Maps and Three Novel MYC-Interacting Genes in Human Gliomas. 2005. 65(19): p. 8679-8689.
- 2 French, P.J., et al., Gene Expression Profiles Associated with Treatment Response in Oligodendrogliomas. *Cancer Research*, 2005. 65(24): p. 11335-11344.
- 3 Gaedcke, J., et al., Mutated KRAS results in overexpression of DUSP4, a MAP-kinase phosphatase, and SMYD3, a histone methyltransferase, in rectal carcinomas. *Genes, Chromosomes and Cancer*, 2010. 49(11): p. 1024-1034.
- 4 Skrzypczak, M., et al., Modeling Oncogenic Signaling in Colon Tumors by Multidirectional Analyses of Microarray Data Directed for Maximization of Analytical Reliability. *PLoS ONE*, 2010. 5(10): p. e13091.
- 5 Hao, Y., et al., Gene expression profiling reveals stromal genes expressed in common between Barrett's esophagus and adenocarcinoma. *Gastroenterology*, 2006. 131(3): p. 925-33.
- 6 Hu, N., et al., Genome wide analysis of DNA copy number neutral loss of heterozygosity (CNNLOH) and its relation to gene expression in esophageal squamous cell carcinoma. *BMC Genomics*, 2010. 11(1): p. 576.
- 7 Chen, X., et al., Variation in Gene Expression Patterns in Human Gastric Cancers. *Molecular Biology of the Cell*, 2003. 14(8): p. 3208-3215.
- 8 Ginos, M.A., et al., Identification of a gene expression signature associated with recurrent disease in squamous cell carcinoma of the head and neck. *Cancer Res*, 2004. 64(1): p. 55-63.
- 9 Peng, C.H., et al., A novel molecular signature identified by systems genetics approach predicts prognosis in oral squamous cell carcinoma. *PLoS One*, 2011. 6(8): p. e23452.
- 10 Toruner, G.A., et al., Association between gene expression profile and tumor invasion in oral squamous cell carcinoma. *Cancer Genet Cytogenet*, 2004. 154(1): p. 27-35.
- 11 Pyeon, D., et al., Fundamental differences in cell cycle deregulation in human papillomavirus-positive and human papillomavirus-negative head/neck and cervical cancers. *Cancer Res*, 2007. 67(10): p. 4605-19.
- 12 Andersson, A., et al., Microarray-based classification of a consecutive series of 121 childhood acute leukemias: prediction of leukemic and genetic subtype as well as of minimal residual disease status. *Leukemia*, 2007. 21(6): p. 1198-203.
- 13 Rosenwald, A., et al., Relation of gene expression phenotype to immunoglobulin mutation genotype in B cell chronic lymphocytic leukemia. *J Exp Med*, 2001. 194(11): p. 1639-47.
- 14 Mas, V.R., et al., Genes involved in viral carcinogenesis and tumor initiation in hepatitis C virus-induced hepatocellular carcinoma. *Mol Med*, 2009. 15(3-4): p. 85-94.
- 15 Wurmbach, E., et al., Genome-wide molecular profiles of HCV-induced dysplasia and hepatocellular carcinoma. *Hepatology*, 2007. 45(4): p. 938-47.
- 16 Badea, L., et al., Combined gene expression analysis of whole-tissue and microdissected pancreatic ductal adenocarcinoma identifies genes specifically overexpressed in tumor epithelia. *HepatoGastroenterology*, 2008. 55(88): p. 2016-27.
- 17 Segara, D., et al., Expression of HOXB2, a retinoic acid signaling target in pancreatic cancer and pancreatic intraepithelial neoplasia. *Clin Cancer Res*, 2005. 11(9): p. 3587-96.
- 18 Iacobuzio-Donahue, C.A., et al., Exploration of global gene expression patterns in pancreatic adenocarcinoma using cDNA microarrays. *Am J Pathol*, 2003. 162(4): p. 1151-62.



- 19 Luo, J.H., et al., Gene expression analysis of prostate cancers. *Mol Carcinog*, 2002. 33(1): p. 25-35.
- 20 Barretina, J., et al., Subtype-specific genomic alterations define new targets for soft-tissue sarcoma therapy. *Nat Genet*, 2010. 42(8): p. 715-21.
- 21 Skotheim, R.I., et al., Differentiation of human embryonal carcinomas in vitro and in vivo reveals expression profiles relevant to normal development. *Cancer Res*, 2005. 65(13): p. 5588-98.
- 22 Korkola, J.E., et al., Down-regulation of stem cell genes, including those in a 200-kb gene cluster at 12p13.31, is associated with in vivo differentiation of human male germ cell tumors. *Cancer Res*, 2006. 66(2): p. 820-7.
- 23 Sperger, J.M., et al., Gene expression patterns in human embryonic stem cells and human pluripotent germ cell tumors. *Proc Natl Acad Sci U S A*, 2003. 100(23): p. 13350-5.
- 24 Glück, S., et al., TP53 genomics predict higher clinical and pathologic tumor response in operable early-stage breast cancer treated with docetaxel-capecitabine ± trastuzumab. *Breast Cancer Res Treat*, 2012. 132(3): p. 781-91.
- 25 Ma, X.J., et al., Gene expression profiling of the tumor microenvironment during breast cancer progression. *Breast Cancer Res*, 2009. 11(1): p. R7.
- 26 Richardson, A.L., et al., X chromosomal abnormalities in basal-like human breast cancer. *Cancer Cell*, 2006. 9(2): p. 121-32.
- 27 Haferlach, T., et al., Clinical utility of microarray-based gene expression profiling in the diagnosis and subclassification of leukemia: report from the International Microarray Innovations in Leukemia Study Group. *J Clin Oncol*, 2010. 28(15): p. 2529-37.
- 28 Choi, Y.L., et al., A genomic analysis of adult T-cell leukemia. *Oncogene*, 2007. 26(8): p. 1245-55.
- 29 Su, L.J., et al., Selection of DDX5 as a novel internal control for Q-RT-PCR from microarray data using a block bootstrap re-sampling scheme. *BMC Genomics*, 2007. 8: p. 140.
- 30 Selamat, S.A., et al., Genome-scale analysis of DNA methylation in lung adenocarcinoma and integration with mRNA expression. *Genome Res*, 2012. 22(7): p. 1197-211.
- 31 Hou, J., et al., Gene expression-based classification of non-small cell lung carcinomas and survival prediction. *PLoS One*, 2010. 5(4): p. e10312.
- 32 Landi, M.T., et al., Gene expression signature of cigarette smoking and its role in lung adenocarcinoma development and survival. *PLoS One*, 2008. 3(2): p. e1651.
- 33 Eckerle, S., et al., Gene expression profiling of isolated tumour cells from anaplastic large cell lymphomas: insights into its cellular origin, pathogenesis and relation to Hodgkin lymphoma. *Leukemia*, 2009. 23(11): p. 2129-38.
- 34 Piccaluga, P.P., et al., Gene expression analysis of peripheral T cell lymphoma, unspecified, reveals distinct profiles and new potential therapeutic targets. *J Clin Invest*, 2007. 117(3): p. 823-34.
- 35 Talantov, D., et al., Novel genes associated with malignant melanoma but not benign melanocytic lesions. *Clin Cancer Res*, 2005. 11(20): p. 7234-42.
